# Supplementary material
Source: PubMed Central journal article supplement (PMC2678066)

# Supplemental Figure 1

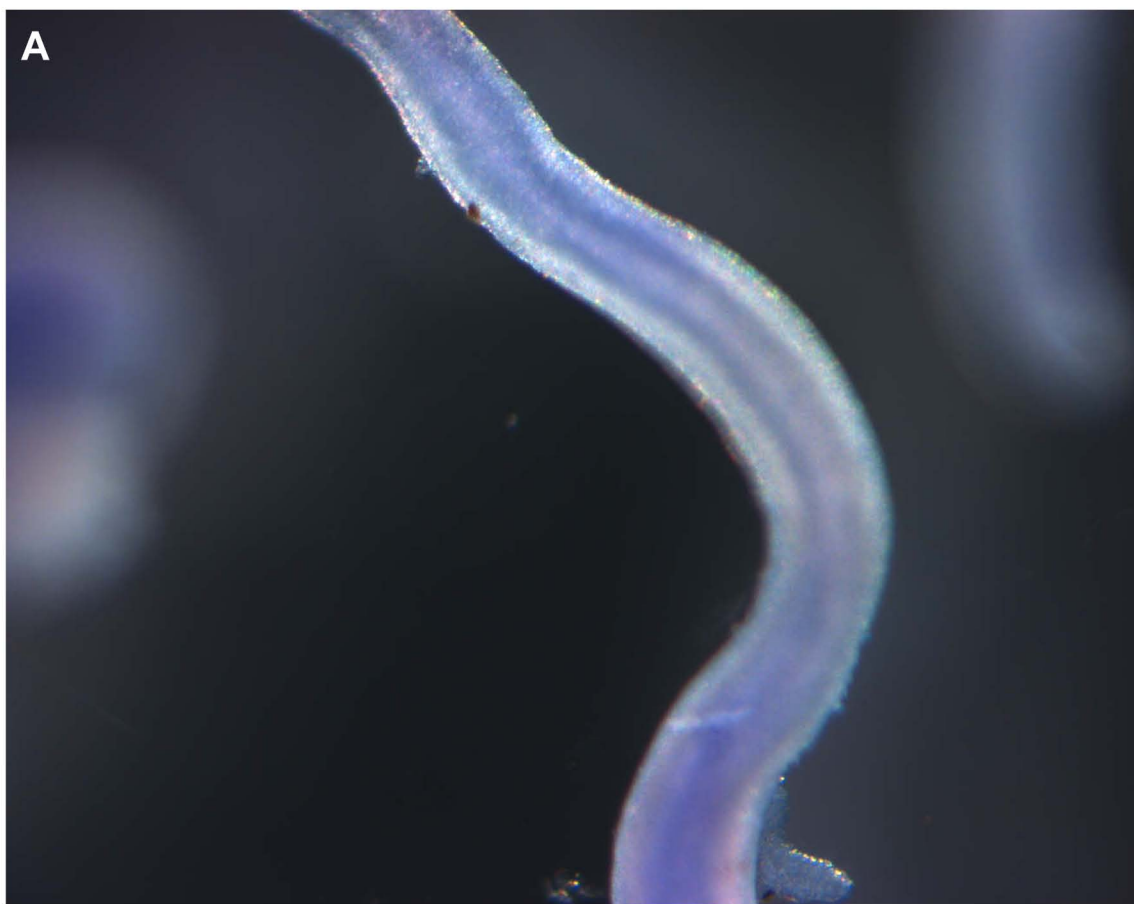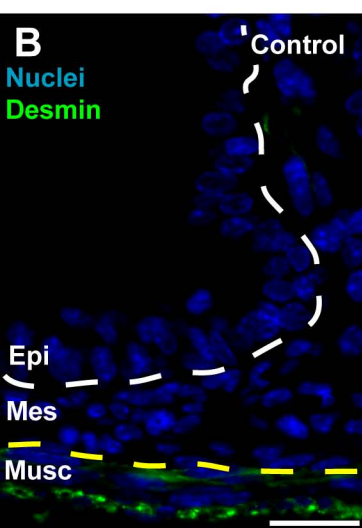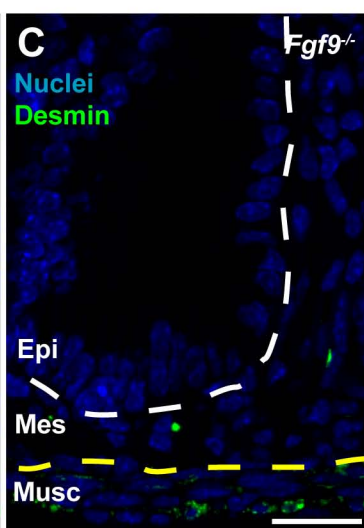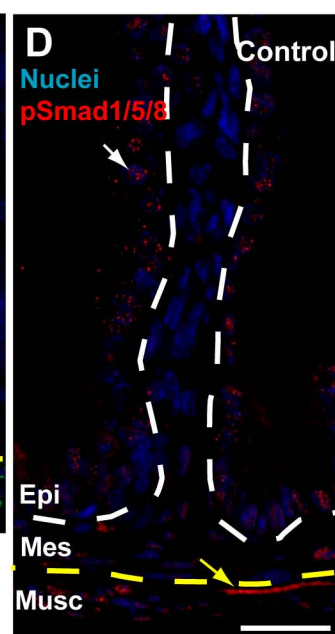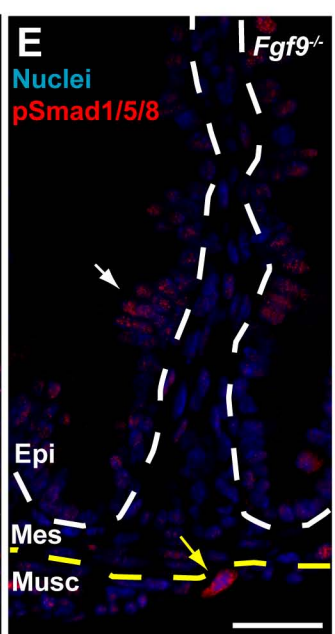

Supplement: NIHMS77020-supplement-1.pdf [file NIHMS77020-supplement-1.pdf]

# Supplemental Figure 2

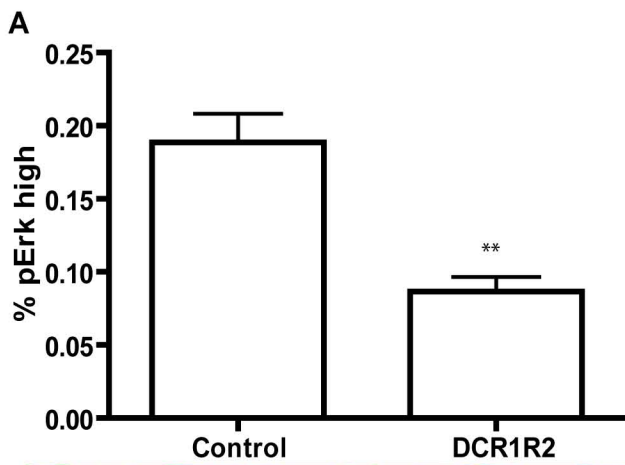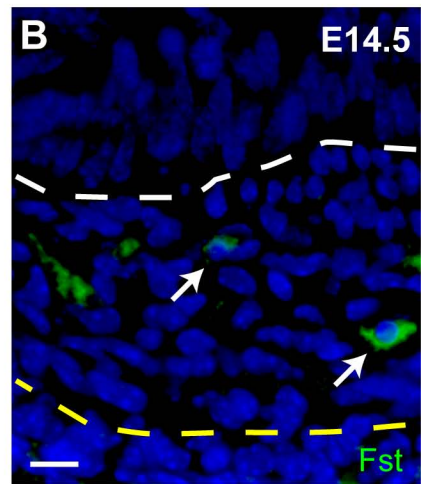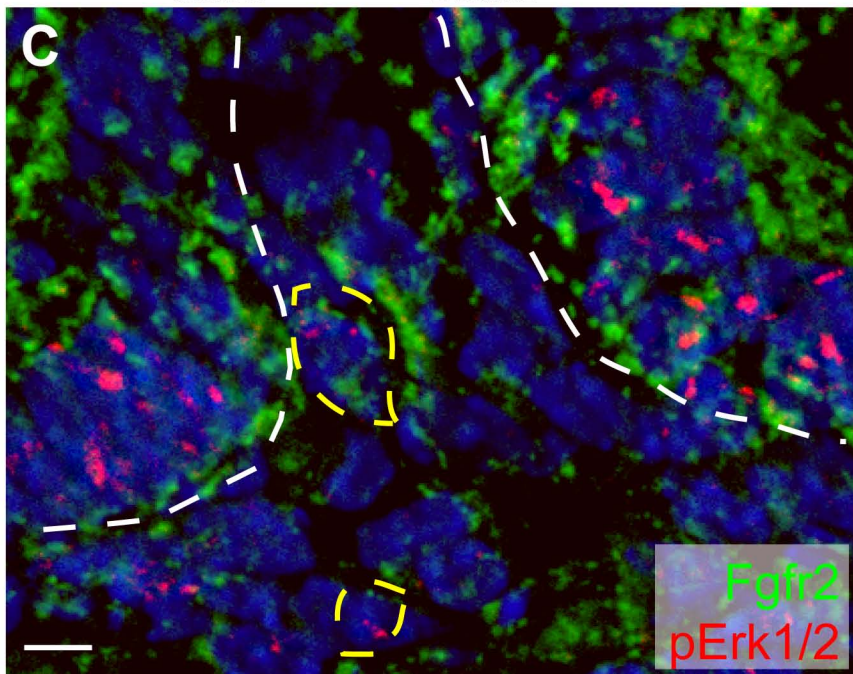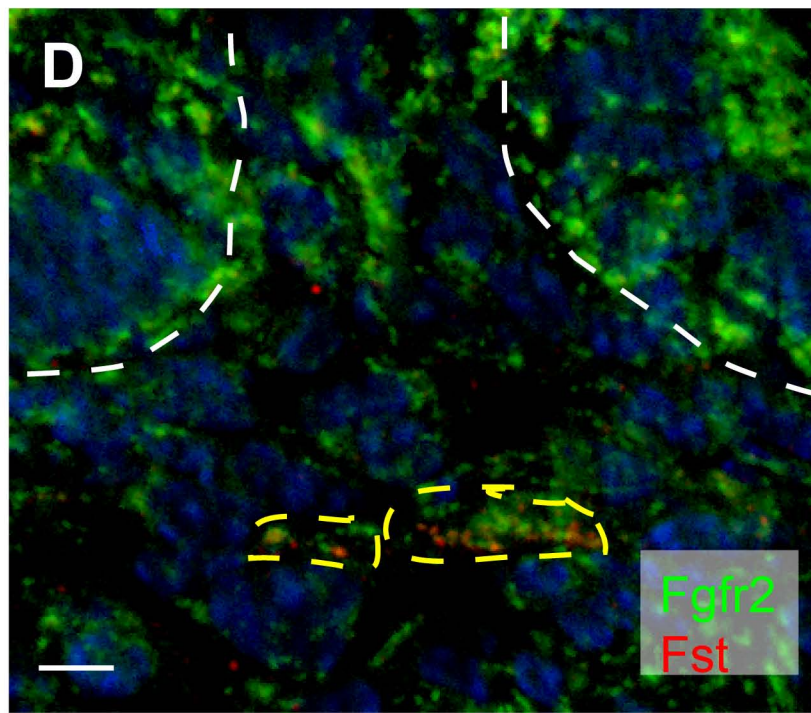

Supplement: NIHMS77020-supplement-2.pdf [file NIHMS77020-supplement-2.pdf]

## Supplemental Figure 3

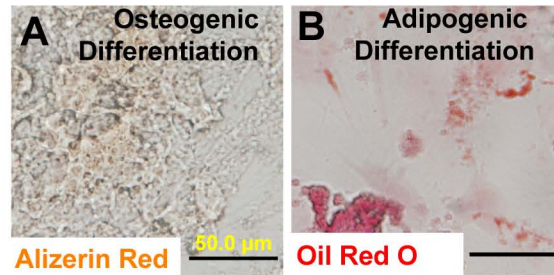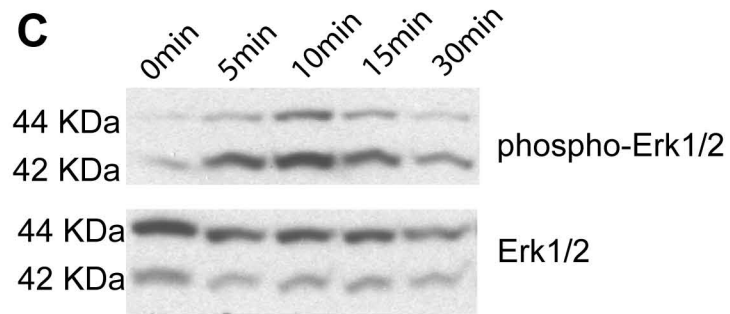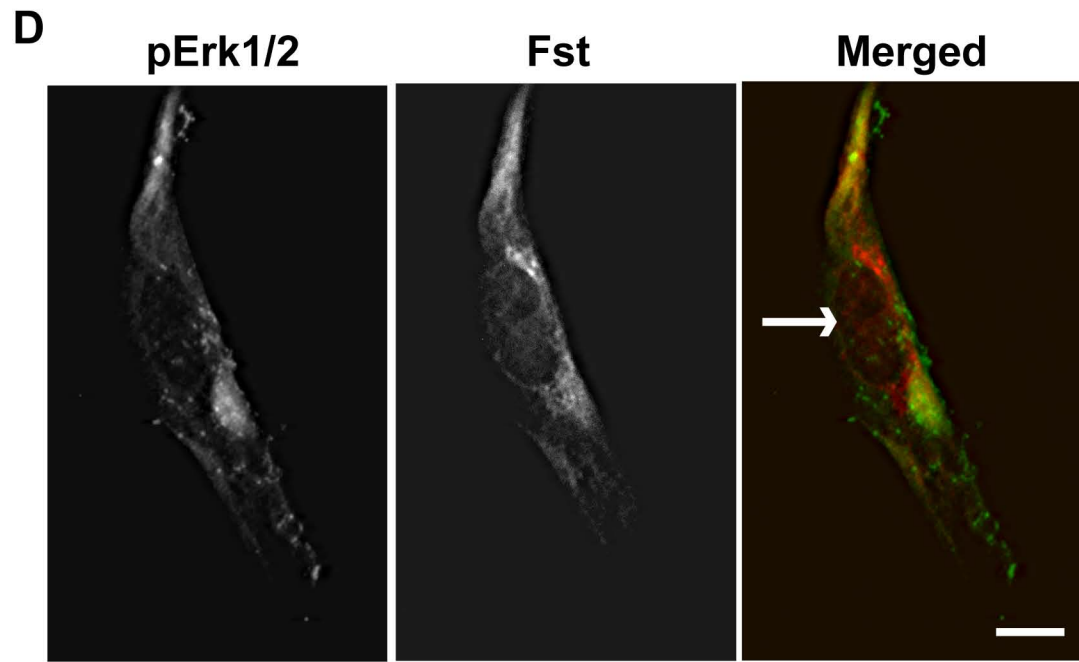

Supplement: NIHMS77020-supplement-3.pdf [file NIHMS77020-supplement-3.pdf]
